# Supplementary material
Source: MDPI journal article supplement (https://www.mdpi.com/2311-5637/9/4/376)
Supplement: s1 [file s1]

## Supplementary materials

**Table S1** Descriptions of the colony morphologies for *S. cerevisiae* strains on WL medium

(28 °C, 5 d)

| Morphologies                                                                        |                                                                                     | Descriptions                                                                                              | Strains codes                                                                                                              | Samples |
|-------------------------------------------------------------------------------------|-------------------------------------------------------------------------------------|-----------------------------------------------------------------------------------------------------------|----------------------------------------------------------------------------------------------------------------------------|---------|
| Obverse                                                                             | Reverse                                                                             |                                                                                                           |                                                                                                                            |         |
|    |    | Cream with slight green, raised, smooth, opaque, neat rim, white on reverse                               | F5-1~4, 6, 7, 9~11, 13~21; F6-3, 4, 6, 7~14 22~24; F7-1~12、14、15、17、20~23, F8-1~9, 11~23; F9-1~24; F10-2~11, 17, 18, 20~23 | Must    |
|    |    | Cream with slight green, raised, smooth, opaque, neat rim, white on reverse                               | F4-2, 7, 15, 18, 23; F5-5, 8; F6-1, 2, 5 F7-13, 16, 18, 19                                                                 | Must    |
|    |    | Cream with light green, raised, rough, opaque, ridged rim, white on reverse                               | F4-13 F8-10, F10-1, 12                                                                                                     | Must    |
|   |   | Central cream with green edge, raised, smooth, opaque, neat edge, central cream and green edge on reverse | F4-14, 17, 19~22, 24 F10-13, 14, 19                                                                                        | Must    |
|  |  | Cream center, raised, rough, opaque, ridged rim. Cream center and green rim on the reverse                | F10-16                                                                                                                     | Must    |
|  |  | Cream with slight green, raised, smooth, opaque, neat rim, white on reverse                               | QLY-21                                                                                                                     | QX      |
|  |  | Cream with slight green, raised, smooth, opaque, neat rim, white on reverse                               | MLY-3, 15, 21 MXY-1, 4, 6, 17, 19, 21, 23                                                                                  | YM      |
|  |  | Cream with slight green, raised, smooth, opaque, neat rim, white on reverse                               | ZLY-4 ZXY-6, 17, 23                                                                                                        | ZH      |
|  |  | Cream with slight green, raised, smooth, opaque, neat rim, white on reverse                               | XLY-1, 4, 10, 16 XXY-2, 6, 8                                                                                               | XXW     |
|  |  | Cream with slight green, raised, smooth, opaque, neat rim, white on reverse                               | BXY-14, 15, 20, 21 BT-2, 4, 5, 9                                                                                           | LSYH    |
|  |  | Cream with slight green, raised, smooth, opaque, neat rim, white on reverse                               | HXY-15, 16, HX-13 HT-3, 8~10, 13, 15, 19                                                                                   | HH      |

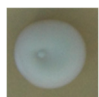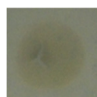

Cream with slight green, raised, SXY-4, 17  
smooth, opaque, neat rim, white DT-1~6, 17  
on reverse

LL

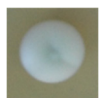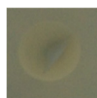

Cream with slight green, raised, CXY-2, 4, 9, 16  
smooth, opaque, neat rim, white LT-4, 8, 14, 19  
on reverse

LS

---

**Notes:** **YM:** Yuma vineyard; **HH:** Huahao vineyard, **QX:** Qinxue vineyard, **ZH:** Zhihuiyuanshi vineyard, **LS:** Liushi vineyard, **LSYH:** Lanshanyunhao vineyard, **XXW:** Xixiawang vineyard, **LL:** Lilan vineyard, **LSD:** Luoshan vineyard.

**Table S2** Sequencing results of the 26S rDNA D1/D2 domain apart of the isolated *S. cerevisiae* strains

| Sources | Strains | Sizes (bp) | Matching nucleotides | The closest relative            | Identity | Gene bank accession |
|---------|---------|------------|----------------------|---------------------------------|----------|---------------------|
| QX      | QLY-21  | 593        | 581/581              | <i>Saccharomyces cerevisiae</i> | 100%     | HQ443692.1          |
| YM      | MXY-1   | 581        | 576/576              | <i>Saccharomyces cerevisiae</i> | 100%     | HQ443690.1          |
| YM      | MLY-5   | 583        | 573/573              | <i>Saccharomyces cerevisiae</i> | 100%     | JQ771732.1          |
| YM      | MLY-13  | 586        | 575/576              | <i>Saccharomyces cerevisiae</i> | 99.80%   | JQ686916.1          |
| YM      | MLY-3   | 600        | 572/580              | <i>Saccharomyces cerevisiae</i> | 98.60%   | JQ771732.1          |
| ZH      | ZXY-6   | 593        | 581/583              | <i>Saccharomyces cerevisiae</i> | 99.70%   | HQ443692.1          |
| XXW     | XLY-1   | 587        | 581/581              | <i>Saccharomyces cerevisiae</i> | 100%     | HQ443692.1          |
| XXW     | XXY-2   | 588        | 582/586              | <i>Saccharomyces cerevisiae</i> | 99.30%   | JQ686916.1          |
| LSYH    | BXY-14  | 581        | 571/571              | <i>Saccharomyces cerevisiae</i> | 100%     | JQ771732.1          |
| LSYH    | BT-2    | 578        | 569/570              | <i>Saccharomyces cerevisiae</i> | 99.80%   | HQ443685.1          |
| HH      | HT-3    | 584        | 575/576              | <i>Saccharomyces cerevisiae</i> | 99.80%   | KM655848.1          |
| HH      | HT-13   | 591        | 581/584              | <i>Saccharomyces cerevisiae</i> | 99.50%   | GU182374.1          |
| LL      | SXY-4   | 600        | 561/569              | <i>Saccharomyces cerevisiae</i> | 98.60%   | HQ443686.1          |
| LL      | DT-1    | 591        | 578/581              | <i>Saccharomyces cerevisiae</i> | 99.50%   | KY109314.1          |
| LS      | LT-4    | 594        | 583/585              | <i>Saccharomyces cerevisiae</i> | 99.70%   | KM589480.1          |
| Must    | F4-2    | 591        | 576/576              | <i>Saccharomyces cerevisiae</i> | 100%     | EU386722.1          |
| Must    | F4-13   | 581        | 573/573              | <i>Saccharomyces cerevisiae</i> | 100%     | JQ686916.1          |
| Must    | F4-17   | 593        | 585/586              | <i>Saccharomyces cerevisiae</i> | 99.80%   | HQ443685.1          |
| Must    | F8-6    | 598        | 584/585              | <i>Saccharomyces cerevisiae</i> | 99.80%   | HQ443685.1          |
| Must    | F8-10   | 597        | 583/585              | <i>Saccharomyces cerevisiae</i> | 99.70%   | KT933338.1          |
| Must    | F10-13  | 582        | 575/575              | <i>Saccharomyces cerevisiae</i> | 100%     | JQ686916.1          |
| Must    | F10-16  | 578        | 567/567              | <i>Saccharomyces cerevisiae</i> | 100%     | KF141641.1          |

**Note:** **YM:** Yuma vineyard; **HH:** Huahao vineyard, **QX:** Qinxue vineyard, **ZH:** Zhihuiyuanshi vineyard, **LS:** Liushi vineyard, **LSYH:** Lanshanyunhao vineyard, **XXW:** Xixiawang vineyard, **LL:** Lilan vineyard, **LSD:** Luoshan vineyard.

**Table S3** Tolerance analysis of the selected *S. cerevisiae* strains

| Sources | Strains       | Sugar (g/L) |        | SO <sub>2</sub> (mg/L) |           |        | Ethanol (% v/v) |           |        |
|---------|---------------|-------------|--------|------------------------|-----------|--------|-----------------|-----------|--------|
|         |               | 250         | RG (%) | 0                      | 100       | IR (%) | 0               | 12        | IR (%) |
| Control | <b>FSC</b>    | 1.56±0.02   | 100.00 | 1.44±0.01              | 0.87±0.03 | 39.46  | 1.64±0.00       | 0.89±0.06 | 45.85  |
| Must    | <b>F4-13</b>  | 1.50±0.02   | 96.40  | 1.52±0.03              | 1.48±0.03 | 2.24   | 1.45±0.01       | 1.16±0.02 | 20.23  |
| Must    | <b>F5-7</b>   | 1.38±0.04   | 88.69  | 1.40±0.07              | 0.80±0.00 | 42.46  | 1.51±0.01       | 0.82±0.03 | 45.67  |
| Must    | <b>F5-9</b>   | 1.48±0.03   | 94.97  | 1.38±0.01              | 1.36±0.09 | 1.75   | 1.52±0.02       | 1.14±0.20 | 24.95  |
| Must    | <b>F5-12</b>  | 1.42±0.04   | 90.94  | 1.44±0.01              | 1.37±0.07 | 4.78   | 1.54±0.02       | 1.17±0.05 | 24.13  |
| Must    | <b>F5-18</b>  | 1.48±0.06   | 94.87  | 1.37±0.01              | 1.19±0.04 | 13.21  | 1.52±0.03       | 1.18±0.14 | 22.17  |
| Must    | <b>F5-19</b>  | 1.41±0.03   | 90.41  | 1.32±0.03              | 1.32±0.00 | 0.37   | 1.49±0.01       | 1.12±0.17 | 24.94  |
| Must    | <b>F5-21</b>  | 1.38±0.01   | 88.47  | 1.45±0.12              | 0.98±0.05 | 32.50  | 1.34±0.00       | 1.05±0.04 | 21.67  |
| Must    | <b>F6-8</b>   | 1.45±0.08   | 93.06  | 1.53±0.01              | 1.52±0.00 | 0.43   | 1.42±0.00       | 1.29±0.06 | 9.15   |
| Must    | <b>F6-23</b>  | 1.57±0.01   | 100.95 | 1.50±0.03              | 1.51±0.06 | -0.44  | 1.42±0.03       | 0.89±0.01 | 37.48  |
| Must    | <b>F9-23</b>  | 1.47±0.02   | 94.13  | 1.53±0.03              | 1.07±0.01 | 30.26  | 1.37±0.01       | 0.87±0.04 | 36.88  |
| LL      | <b>SXY-4</b>  | 1.31±0.10   | 84.18  | 1.39±0.03              | 1.04±0.01 | 25.15  | 1.16±0.05       | 0.71±0.09 | 39.45  |
| HH      | <b>HT-10</b>  | 1.40±0.00   | 89.70  | 1.24±0.27              | 1.23±0.10 | 0.77   | 1.14±0.17       | 0.61±0.06 | 46.63  |
| ZH      | <b>ZXY-17</b> | 1.17±0.02   | 74.95  | 1.13±0.13              | 0.81±0.10 | 28.21  | 1.49±0.04       | 1.26±0.03 | 15.23  |
| YM      | <b>MXY-19</b> | 1.22±0.01   | 78.53  | 1.38±0.00              | 0.69±0.14 | 49.84  | 1.06±0.03       | 0.94±0.05 | 11.39  |

**Notes:** Growths of *S. cerevisiae* strains under different stress conditions were expressed as the absorbance value at OD<sub>600nm</sub>. **RG:** Relative growth rate of selected *S. cerevisiae* strains; **IR:** Inhibition rate of selected *S. cerevisiae* strains. **LL:** Lilan vineyard, **HH:** Huahao vineyard, **ZH:** Zhihuiyuanshi vineyard, **YM:** Yuma vineyard.
